# Supplementary material
Source: publisher figshare collection journal article supplement (https://sage.figshare.com/ndownloader/files/22810301)
Supplement: Supplementary file 1 [file 22810301]

**OMB Control No. 0990-College Sexual Assault Policy**

**Expiration Date: [DATE]**

**Campus Interview Guide**

The goal of these interviews is to collect information regarding campus’ experiences with the OWH College Sexual Assault Policy and Prevention Initiative. Questions in this discussion guide include overarching discussion questions with sub-questions to provide details.

**Interviewer:**

**Interviewees:**

**Introduction**

The goal of this interview is to learn about campus programmatic and policy development in relation to the College Sexual Assault Policy and Prevention Initiative (CSAPP), funded by the Office on Women’s Health. The findings from this interview will inform a final report, developed by NORC at the University of Chicago, detailing major accomplishments from the Initiative, any problems encountered, and lessons learned. This interview is not evaluating you or the success of your Initiative, but rather to inform future programs and prevention initiatives.

You may know the CSAPP Initiative as [Grantee Project Name]. In the course of this interview, would it be clearer to use this name to refer to the project?

***(Added on 5/9/19)***

- A few things before we get started:
  - I (main interviewer) will be leading the discussion, but [Notetaker] will be notetaking and may, at times, ask for clarification or otherwise follow-up on your responses.
  - We’ve scheduled this meeting to last 1 hour.
  - The purpose of these calls is not evaluate you, but to assess barriers, challenges, experiences and lessons learned from the initiative, to inform future programming. OWH will not be joining us on these calls.
  - We will be conducting discussions with other CSAPP stakeholders. We will summarize our findings from these discussions and nothing in our report will be cited as coming directly from you.
  - If any questions come up after we leave here today, please feel free to contact me [whomever is leading the call, email address] or the project director for the study, Elizabeth Mumford.
- The main objectives for our discussion today are to discuss:
  - Your partnership with [Grantee]
  - Your experiences developing and implementing a SART and taskforce on your campus
  - Your experiences developing and implementing prevention programming and social media campaigns
  - Perceived impact of the initiative on sexual violence on your campus
  - Experiences trying to change sexual misconduct policy on your campus
  - Plans for sustainability of initiative activities, if any

**Background and Context**

1. We are interested in your role on the CSAPP initiative.  Could you talk about what you do for CSAPP and how your specific job on campus positions you in to make progress on the CSAPP Initiative goals?
2. Were there any critical/sentinel local events that might have affected the project or student population? (*e.g., a change in key leaders/champions; a change in other funding; media coverage of sexual assault*)
3. How does the CSAPP Initiative fit with your other sexual assault prevention Initiatives past and present?
   1. Are CSAPP activities the main source of prevention programming on campus? Are there other Initiatives occurring simultaneously?
   2. Has the CSAPP Initiative changed your campus’ approach to sexual assault prevention, programming, and policy? If so, how? (PROMPTS: *e.g., kicked off entirely new campus programming; expanded existing efforts; addressed policy issues that were not being addressed; etc.*)

**Partnership**

We’d like to ask you about your partnership with [Grantee].

1. How frequently were you in communication with [Grantee] and was this primarily in-person, email, or phone conversations?
2. What worked well in the partnership?
   1. Do you have any recommendations regarding communications and constructive approaches for future partnerships or coalitions?
   2. PROMPTS: *What were some of the lessons learned from the partnership? Were there any issues you encountered?*
3. To what extent did the grantee facilitate communications between your campus and the grantee’s other partner campuses within the CSAPP Initiative?
4. Can you tell me about the technical assistance (including trainings) that [Grantee] provided to your campus during the CSAPP Initiative?
   1. How did these trainings and this technical assistance impact the success of the Initiative on your campus?
   2. PROMPTS: *What assistance did you receive that was notably helpful? Was there any TA you would have liked to receive, but didn’t?*
5. Do you have plans to sustain the partnership beyond the CSAPP Initiative?
   1. [IF YES] How do you plan on sustaining the partnership?
   2. [IF NOT] Why not?

**Taskforces and SARTs**

Next, we’d like to ask you about the process of forming your campus Taskforce. It looks like you had a taskforce formed by the end of the [X] quarter of the project (Timeframe), if not before.

1. Can you tell me about your experience forming your Taskforce and encouraging active participation from its members?
   1. What factors facilitated Taskforce formation and/or active participation?
   2. It looks like you have had [some/no] turnover in Taskforce membership, what do you attribute this to?
   3. PROMPTS: *What difficulties, if any, did you encounter when forming the Taskforce or encouraging active participation from its members?* *If so, what were some of the strategies that were used or could be used to overcome those challenge*s?
2. What do you see as the contributions and value of the Taskforce?
   1. PROMPTS: *What worked well with your Taskforce? What was the Taskforce’s most significant one or two accomplishments? To what would you attribute the challenges/success of your Taskforce?*
3. Do you have any plans to maintain the Taskforce once the CSAPP Initiative formally ends?
   1. [IF YES] What are they?
   2. [IF NOT] Why not?

Next, we’d like to ask you about the process of [forming or joining] a SART. It looks like you might have had a SART formed by the end of the [X] quarter of the project (Timeframe), if not before, (similar to/unlike) the taskforce. [Note: Some campuses have taken different approaches to forming SARTs, including collaborating with a statewide SART. The interview questions will be tailored to the campus’ approach to SART formation]

1. Can you tell me about your experience [joining/forming] your campus SART and encouraging active participation from its members?
   1. PROMPTS: *What factors facilitated SART formation and active engagement? What were some of the strategies that were used or could be used to overcome any challenges you faced? It looks like you have had [some/no] turnover in SART membership, what do you attribute this to?*
2. What do you see as the contributions and value of the SART?
   1. What worked well with your SART? What was the SART’s most significant one or two accomplishments? To what would do you attribute the challenges/success of your SART?
3. Do you have any plans to maintain the SART post-CSAPP Initiative?
   1. [IF YES] What are they?
   2. [IF NOT] Why not?

**Prevention Programming**

1. Of the **prevention programs implemented or influenced by the CSAPP Initiative**: [HAVE LIST OF PROGRAMS IMPLEMENTED PREPARED FROM QUARTERLY PROGRESS REPORTS].

| **Quarter** | **Program** |
| --- | --- |
|  |  |
|  |  |

- 1. What do you think made the prevention program so successful? What were some lessons learned from particular programs or the overall process?

1. Can you describe any barriers you faced in implementing prevention programs, if any?
   1. [IF YES] What were some of the strategies that were used or that you now think would be constructive to overcome those challenges?
2. How was the campus participation in prevention programming, including students, faculty, staff, or other groups?
   1. How did you encourage participation in prevention programs?
3. Do you have any plans to maintain any of the prevention programs implemented or influenced by the CSAPP Initiative after it formally ends?
   1. [IF YES] How do you plan to maintain the programs? (PROMPTS: *Were there aspects of one or more programs that make it a more feasible “keeper”?*)
   2. [IF NOT] Why not? (PROMPTS: *Are barriers related to features of the program itself, or external to the program, or both?*)
   3. Have any of the prevention programs been added to your campus’ sexual misconduct policy (i.e. as a result of the CSAPP Initiative)?

**Social Media**

1. Of the **social media programs implemented or influenced by the CSAPP Initiative, such as** [Examples], what were the most successful?
   1. In your experience with these efforts, how do you interpret/evaluate the success of a social media campaign?
   2. What do you think contributed to the success of the social media campaign?
2. What were some of the main takeaways or lessons learned from implementing social media programs?
3. What barriers or challenges, if any, did you face in implementing social media campaigns?
   1. [IF ANY] What were some of the strategies that were used or could be used to overcome those challenges?
4. Do you have any plans to maintain any of the social media accounts or campaigns implemented or influenced by the CSAPP Initiative post- Initiative?
   1. [IF YES] Are there particular steps or plans in the works that you can share now?
5. How has the CSAPP Initiative informed your long-term social media or communications strategy?

**Crime Statistics**

1. Over the course of the CSAPP Initiative, it looks like the rate of interpersonal violence on your campus has [decreased/increased with respect to timeframe], to what do you attribute to this change in reported sexual assault rates?
2. In your opinion, have you seen an overall change in the climate regarding interpersonal violence/sexual assault (and/or sexual assault reporting) on your campus?
   1. [IF YES] Can you talk about the role that the CSAPP Initiative had, if any, in contributing to his change?
   2. PROMPTS: *What have your results of the Campus Climate Surveys shown? Are these CCS data consistent with your own impressions/observations? If not, where are the gaps or conflicts in this picture?*

**Campus Policy**

In reviewing your campus responses to the quarterly progress reports, it appears that your campus made some policy changes over the past three years [HAVE LIST OF POLICY CHANGES PREPARED FROM QUARTERLY PROGRESS REPORTS].

| **Qrtr** | **Policy Change** |
| --- | --- |
|  |  |

1. [IF ANY] In your opinion, what were the major policy changes that were implemented on your campus?
2. Can you tell me about your experiences trying to change campus policy?
   1. What events, people, and/or contextual factors (i.e. particular roles in the administration, community or student body) helped encourage or facilitate policy changes on your campus?
   2. [IF CHALLENGES ARE MENTIONED]What were some of the strategies that were used, or you know think could be used, to overcome any challenges you faced?
3. What, if any, policy changes have you tried to implement that have not yet been achieved?
   1. Who are the champions of moving this policy change forward?
   2. What do you think the barriers are to getting this policy in place?
   3. Are you continuing or pausing on those efforts?

**Next Steps**

1. After the CSAPP Initiative finishes, how do you plan on sustaining the changes and programs implemented during the Initiative?
   1. PROMPTS: *This could include any programming, policy, administrative, or other changes.*
   2. PROMPTS: *Thinking about funding resources and needs; or organizational structures?*
   3. [IF NOT SUSTAINABLE] If you do not expect that any of the CSAPP activities will be sustainable after the formal end of the project, why not?
2. Do you have anything else to add that would be important to share to help us understand your story and how your work can be sustained that we can include in our report to OWH?

Thank you for sharing your experiences with us. Please feel free to reach out to us if you have any questions.
